# Supplementary material for: Genetic and Clinical Distinction between Aggressive NK-cell Leukemia and Extranodal NK/T-cell Lymphoma with Bone Marrow Involvement
Source: Research Square preprint supplement (doi:10.21203/rs.3.rs-5740535/v1), 2025-04-28

**Supplementary Table S1. List of 282 genes targeted for sequencing**

|                |               |                  |                |                 |                 |
|----------------|---------------|------------------|----------------|-----------------|-----------------|
| <i>ABL1</i>    | <i>CD83</i>   | <i>FGFR3</i>     | <i>KIK3R1</i>  | <i>PAX5</i>     | <i>SGK1</i>     |
| <i>ACD</i>     | <i>CDK4</i>   | <i>FLT3</i>      | <i>KIT</i>     | <i>PDCD1LG2</i> | <i>SH2B3</i>    |
| <i>AKT1</i>    | <i>CDK6</i>   | <i>FOXO1</i>     | <i>KLF2</i>    | <i>PDGFRA</i>   | <i>SMARCA4</i>  |
| <i>ALK</i>     | <i>CDKN1B</i> | <i>FOXP1</i>     | <i>KLHL6</i>   | <i>PDGFRB</i>   | <i>SMARCB1</i>  |
| <i>ANKRD26</i> | <i>CDKN2A</i> | <i>GATA1</i>     | <i>KMT2A</i>   | <i>PDS5B</i>    | <i>SMC1A</i>    |
| <i>APC</i>     | <i>CDKN2B</i> | <i>GATA2</i>     | <i>KMT2C</i>   | <i>PHF6</i>     | <i>SMC3</i>     |
| <i>ARAF</i>    | <i>CDKN2C</i> | <i>GATA3</i>     | <i>KMT2D</i>   | <i>PIGA</i>     | <i>SOCS1</i>    |
| <i>ARID1A</i>  | <i>CEBPA</i>  | <i>GNAI3</i>     | <i>KRAS</i>    | <i>PIK3CB</i>   | <i>SOCS3</i>    |
| <i>ARID1B</i>  | <i>CHEK2</i>  | <i>GNAS</i>      | <i>LCK</i>     | <i>PIK3CD</i>   | <i>SPEN</i>     |
| <i>ARID2</i>   | <i>CIITA</i>  | <i>GPR34</i>     | <i>LMO2</i>    | <i>PIK3CA</i>   | <i>SPIB</i>     |
| <i>ASXL1</i>   | <i>CKS1B</i>  | <i>GTF21</i>     | <i>LRRFIP1</i> | <i>PIM1</i>     | <i>SRC</i>      |
| <i>ASXL2</i>   | <i>CNOT3</i>  | <i>HDAC9</i>     | <i>LTB</i>     | <i>PLCG2</i>    | <i>SRSF2</i>    |
| <i>ASXL3</i>   | <i>CRBN</i>   | <i>HIST1H1B</i>  | <i>MAP2K1</i>  | <i>POT1</i>     | <i>SRSF3</i>    |
| <i>ATM</i>     | <i>CREBBP</i> | <i>HIST1H1C</i>  | <i>MAP2K4</i>  | <i>POU2AF1</i>  | <i>STAG2</i>    |
| <i>ATRX</i>    | <i>CSF1R</i>  | <i>HIST1H1D</i>  | <i>MAP3K1</i>  | <i>POU2F2</i>   | <i>STAT1</i>    |
| <i>B2M</i>     | <i>CSF3R</i>  | <i>HIST1H1E</i>  | <i>MAP3K13</i> | <i>PPM1D</i>    | <i>STAT3</i>    |
| <i>BCL10</i>   | <i>CTCF</i>   | <i>HIST1H2AC</i> | <i>MAPK10</i>  | <i>PRDM1</i>    | <i>STAT5A</i>   |
| <i>BCL11A</i>  | <i>CTNNB1</i> | <i>HIST1H2AG</i> | <i>MCL1</i>    | <i>PRKCB</i>    | <i>STAT5B</i>   |
| <i>BCL2</i>    | <i>CUX1</i>   | <i>HIST1H2AM</i> | <i>MECOM</i>   | <i>PRPF8</i>    | <i>STAT6</i>    |
| <i>BCL6</i>    | <i>CXCR4</i>  | <i>HIST1H2BC</i> | <i>MED12</i>   | <i>PTCH1</i>    | <i>STK11</i>    |
| <i>BCL7A</i>   | <i>CYLD</i>   | <i>HIST1H2BD</i> | <i>MEF2B</i>   | <i>PTEN</i>     | <i>SUZ12</i>    |
| <i>BCOR</i>    | <i>DDX3X</i>  | <i>HIST1H2BG</i> | <i>MET</i>     | <i>PTK2B</i>    | <i>SYK</i>      |
| <i>BCORL1</i>  | <i>DDX41</i>  | <i>HIST1H2BK</i> | <i>MGA</i>     | <i>PTPN11</i>   | <i>TBL1XR1</i>  |
| <i>BIRC2</i>   | <i>DIS3</i>   | <i>HIST1H3B</i>  | <i>MPEG1</i>   | <i>PTPN2</i>    | <i>TCF3</i>     |
| <i>BIRC3</i>   | <i>DNMT3A</i> | <i>HIST1H3G</i>  | <i>MPL</i>     | <i>PTPN23</i>   | <i>TENT5C</i>   |
| <i>BLM</i>     | <i>DNMTA</i>  | <i>HLA-A</i>     | <i>MSH2</i>    | <i>PTPN4</i>    | <i>TERC</i>     |
| <i>BRAF</i>    | <i>DTX1</i>   | <i>HLA-B</i>     | <i>MSH6</i>    | <i>PTPN6</i>    | <i>TERT</i>     |
| <i>BTG1</i>    | <i>EBF1</i>   | <i>HLA-C</i>     | <i>MSN</i>     | <i>PTPRC</i>    | <i>TET1</i>     |
| <i>BTG2</i>    | <i>ECSIT</i>  | <i>HRAS</i>      | <i>MTOR</i>    | <i>PTPRD</i>    | <i>TET2</i>     |
| <i>BTK</i>     | <i>EGFR</i>   | <i>ID3</i>       | <i>MYB</i>     | <i>PTPRK</i>    | <i>THRAP3</i>   |
| <i>CALR</i>    | <i>EGR1</i>   | <i>IDH1</i>      | <i>MYC</i>     | <i>RAD21</i>    | <i>TLR2</i>     |
| <i>CARD11</i>  | <i>EGR2</i>   | <i>IDH2</i>      | <i>MYD88</i>   | <i>RAD51</i>    | <i>TMEM30A</i>  |
| <i>CASP8</i>   | <i>ELANE</i>  | <i>IGH</i>       | <i>NF1</i>     | <i>RASA2</i>    | <i>TMSB4X</i>   |
| <i>CBFB</i>    | <i>EP300</i>  | <i>IKBKB</i>     | <i>NF2</i>     | <i>RB1</i>      | <i>TNF</i>      |
| <i>CBL</i>     | <i>ERBB2</i>  | <i>IKZF1</i>     | <i>NFE2</i>    | <i>RCOR1</i>    | <i>TNFAIP2</i>  |
| <i>CCND1</i>   | <i>ERBB3</i>  | <i>IKZF3</i>     | <i>NFKB1</i>   | <i>REL</i>      | <i>TNFAIP3</i>  |
| <i>CCND2</i>   | <i>ETNK1</i>  | <i>IL2RG</i>     | <i>NFKB2</i>   | <i>RHOA</i>     | <i>TNFRSF14</i> |
| <i>CCND3</i>   | <i>ETV6</i>   | <i>IL7R</i>      | <i>NFKB1A</i>  | <i>ROS1</i>     | <i>TP53</i>     |
| <i>CCNE1</i>   | <i>EZH2</i>   | <i>INPP5D</i>    | <i>NFKBIE</i>  | <i>RPS15</i>    | <i>TRAF3</i>    |
| <i>CCR6</i>    | <i>FAS</i>    | <i>IRF1</i>      | <i>NFKBIZ</i>  | <i>RUNX1</i>    | <i>U2AF1</i>    |
| <i>CD22</i>    | <i>FAT1</i>   | <i>IRF4</i>      | <i>NOTCH1</i>  | <i>SAMD9</i>    | <i>U2AF2</i>    |
| <i>CD274</i>   | <i>FAT3</i>   | <i>IRF8</i>      | <i>NOTCH2</i>  | <i>SAMD9L</i>   | <i>UBR5</i>     |
| <i>CD28</i>    | <i>FAT4</i>   | <i>ITPKB</i>     | <i>NPM1</i>    | <i>SETBP1</i>   | <i>VAV1</i>     |
| <i>CD58</i>    | <i>FBX011</i> | <i>JAK1</i>      | <i>NRAS</i>    | <i>SETD2</i>    | <i>WT1</i>      |
| <i>CD70</i>    | <i>FBXW7</i>  | <i>JAK2</i>      | <i>NSD2</i>    | <i>SETDB1</i>   | <i>XPO1</i>     |
| <i>CD79A</i>   | <i>FGFR1</i>  | <i>JAK3</i>      | <i>NTRK1</i>   | <i>SF1</i>      | <i>ZFP36L1</i>  |
| <i>CD79B</i>   | <i>FGFR2</i>  | <i>KDM6A</i>     | <i>P2RY8</i>   | <i>SF3B1</i>    | <i>ZRSR2</i>    |

**Supplementary Table S2. Sequencing quality and depth of coverage of each sample**

| Study ID <sup>a</sup> | On Target (%) | Mean Target Depth (×) | 50× (%) | 100× (%) |
|-----------------------|---------------|-----------------------|---------|----------|
| A1                    | 39            | 494                   | 90      | 80       |
| A2                    | 75            | 833                   | 97      | 90       |
| A3                    | 48            | 624                   | 90      | 82       |
| A4                    | 49            | 609                   | 91      | 83       |
| A5                    | 62            | 690                   | 96      | 88       |
| A6                    | 73            | 937                   | 97      | 91       |
| A7                    | 51            | 691                   | 98      | 92       |
| A8                    | 57            | 744                   | 98      | 93       |
| A9                    | 58            | 472                   | 91      | 82       |
| A10                   | 44            | 555                   | 93      | 84       |
| A11                   | 63            | 851                   | 99      | 95       |
| A12                   | 70            | 832                   | 98      | 93       |
| A13                   | 66            | 950                   | 98      | 95       |
| A14                   | 54            | 786                   | 98      | 92       |
| A15                   | 65            | 772                   | 97      | 90       |
| E1                    | 49            | 704                   | 97      | 90       |
| E2                    | 62            | 717                   | 97      | 89       |
| E3                    | 76            | 831                   | 94      | 87       |
| E4                    | 34            | 464                   | 92      | 82       |
| E5                    | 55            | 703                   | 98      | 91       |

<sup>a</sup> Study subjects were assigned unique identification numbers, which correspond to the order of samples (x-axis) in Figure 1.

**Supplementary Table S3. Comparison of SNVs/indels between ANKL and ENKTL-BM**

|                              | ANKL (n=15) | ENKTL-BM (n=5) | <i>P</i> value <sup>a</sup> |
|------------------------------|-------------|----------------|-----------------------------|
| <b>SNV/indel<sup>b</sup></b> |             |                |                             |
| <b>Single gene</b>           |             |                |                             |
| <i>DDX3X</i>                 | 3 (20.0%)   | 1 (20.0%)      | 1.000                       |
| <i>FGFR3</i>                 | 2 (13.3%)   | 0 (0.0%)       | 1.000                       |
| <i>SETD2</i>                 | 2 (13.3%)   | 0 (0.0%)       | 1.000                       |
| <i>PIK3R1</i>                | 3 (20.0%)   | 0 (0.0%)       | 0.539                       |
| <i>PIK3CB</i>                | 2 (13.3%)   | 0 (0.0%)       | 1.000                       |
| <i>PDGFRB</i>                | 3 (20.0%)   | 0 (0.0%)       | 0.539                       |
| <i>ERBB2</i>                 | 3 (20.0%)   | 0 (0.0%)       | 0.539                       |
| <i>IKZF3</i>                 | 3 (20.0%)   | 0 (0.0%)       | 0.539                       |
| <i>PTPN11</i>                | 2 (13.3%)   | 0 (0.0%)       | 1.000                       |
| <i>NFKB1</i>                 | 2 (13.3%)   | 0 (0.0%)       | 1.000                       |
| <i>ASXL3</i>                 | 2 (13.3%)   | 0 (0.0%)       | 1.000                       |
| <i>MAP2K1</i>                | 2 (13.3%)   | 0 (0.0%)       | 1.000                       |
| <i>IRF1</i>                  | 1 (6.7%)    | 1 (20.0%)      | 0.447                       |
| <i>TET2</i>                  | 1 (6.7%)    | 0 (0.0%)       | 1.000                       |
| <i>GATA1</i>                 | 0 (0.0%)    | 1 (20.0%)      | 0.25                        |
| <i>UBR5</i>                  | 3 (20.0%)   | 2 (40.0%)      | 0.560                       |
| <i>BCORL1</i>                | 3 (20.0%)   | 0 (0.0%)       | 0.539                       |
| <i>BCOR</i>                  | 2 (13.3%)   | 0 (0.0%)       | 1.000                       |
| <i>DNMT3A</i>                | 2 (13.3%)   | 1 (20.0%)      | 1.000                       |
| <i>MGA</i>                   | 3 (20.0%)   | 0 (0.0%)       | 0.539                       |
| <i>EP300</i>                 | 2 (13.3%)   | 1 (20.0%)      | 1.000                       |
| <i>SPEN</i>                  | 3 (20.0%)   | 0 (0.0%)       | 0.539                       |
| <i>PRDM1</i>                 | 1 (6.7%)    | 0 (0.0%)       | 1.000                       |
| <i>APC</i>                   | 4 (26.7%)   | 1 (20.0%)      | 1.000                       |
| <i>TP53</i>                  | 4 (26.7%)   | 0 (0.0%)       | 0.530                       |
| <i>NOTCH1</i>                | 1 (6.7%)    | 0 (0.0%)       | 1.000                       |
| <i>FAS</i>                   | 2 (13.3%)   | 0 (0.0%)       | 1.000                       |
| <i>CREBBP</i>                | 1 (6.7%)    | 0 (0.0%)       | 1.000                       |
| <i>CIITA</i>                 | 3 (20.0%)   | 0 (0.0%)       | 0.539                       |
| <i>INPP5D</i>                | 2 (13.3%)   | 0 (0.0%)       | 1.000                       |
| <i>PRPF8</i>                 | 2 (13.3%)   | 0 (0.0%)       | 1.000                       |
| <i>CTNNB1</i>                | 0 (0.0%)    | 1 (20.0%)      | 0.250                       |
| <b>Family/pathway</b>        |             |                |                             |
| <i>DDX</i> family            | 3 (20.0%)   | 2 (40.0%)      | 0.560                       |
| <i>FGFR</i> family           | 3 (20.0%)   | 1 (20.0%)      | 1.000                       |
| <i>SETD</i> family           | 3 (20.0%)   | 1 (20.0%)      | 1.000                       |
| <i>PIK3</i> family           | 4 (26.7%)   | 0 (0.0%)       | 0.530                       |
| <i>PDGFR</i> family          | 3 (20.0%)   | 1 (20.0%)      | 1.000                       |
| <i>ERBB</i> family           | 3 (20.0%)   | 0 (0.0%)       | 0.539                       |
| <i>IKZF</i> family           | 3 (20.0%)   | 0 (0.0%)       | 0.539                       |
| <i>PTP</i> family            | 4 (26.7%)   | 0 (0.0%)       | 0.530                       |
| <i>NFKB</i> family           | 3 (20.0%)   | 1 (20.0%)      | 1.000                       |
| <i>ASXL</i> family           | 2 (13.3%)   | 0 (0.0%)       | 1.000                       |
| RAS-MAPK pathway             | 3 (20.0%)   | 0 (0.0%)       | 0.539                       |
| <i>BCOR-BCORL1</i>           | 5 (33.3%)   | 0 (0.0%)       | 0.266                       |
| Epigenetic modifiers         | 12 (80.0%)  | 3 (60.0%)      | 0.560                       |
| Tumor suppressor genes       | 8 (53.3%)   | 1 (20.0%)      | 0.319                       |

<sup>a</sup> Statistical significance was analyzed using Fisher's exact test for categorical variables and Mann–Whitney U test for continuous variables. Frequencies of categorical variables and median values with

interquartile ranges for continuous variables are presented. *P* value < 0.05 was considered statistically significant.

<sup>b</sup> The order of genes and families/pathways is consistent with that in Figure 1. For single genes, those with high frequencies of mutations and previously reported in the literature were selected for display.

Abbreviations: ANKL, aggressive NK-cell leukemia; ENKTL-BM, extranodal NK/T-cell lymphoma with bone marrow involvement; SNV, single nucleotide variant; indel, small insertion or deletion

**Supplementary Figure S1.** The remaining part of the oncoplot not shown in Figure 1. The order of the study subjects (x-axis) is the same as in Figure 1. In total, 68 genes are listed in alphabetical order. Abbreviations: ANKL, aggressive NK-cell leukemia; ENKTL-BM, extranodal NK/T-cell lymphoma with bone marrow involvement

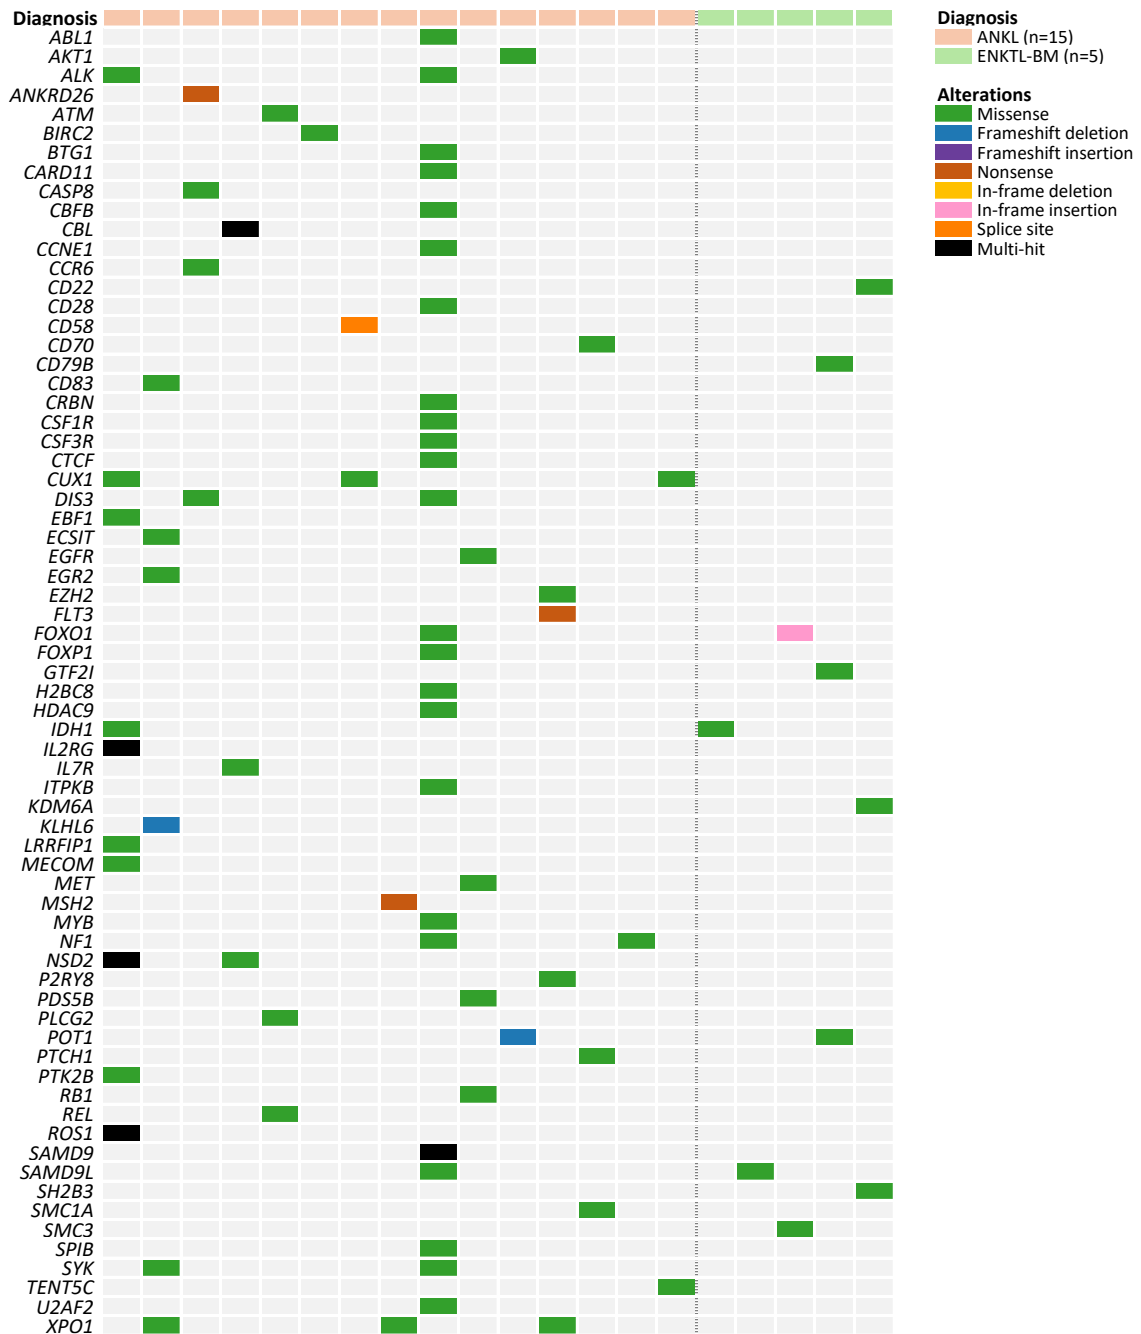

**Supplementary Figure S2.** Lollipop plot of FAT atypical cadherin 1 (*FAT1*) gene. Among 7 SNVs detected in the *FAT1* gene, 6 SNVs (85.7%) were located in the cadherin tandem repeat domain. This plot was generated using the visualization tool ProteinPaint from St. Jude Children's Research Hospital. Abbreviations: ANKL, aggressive NK-cell leukemia; SNV, single nucleotide variant

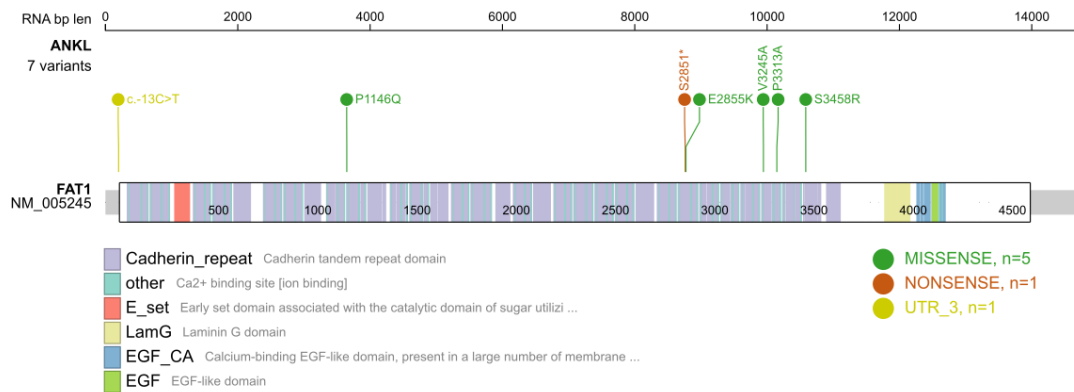

**Supplementary Figure S3.** Comparison of age, tumor burden, total bilirubin, LDH, and CBC between WT *FAT1* (n=9) and mutated *FAT1* (n=6) in ANKL. No significant difference was observed between the two groups. Mann–Whitney U test was used for group comparisons and  $P$  value  $< 0.05$  was considered statistically significant. Abbreviations: WT, wild type; mut, mutated; PB, peripheral blood; BM, bone marrow; LDH, lactate dehydrogenase; Hb, hemoglobin; WBC, white blood cell; ANC, absolute neutrophil count; ALC, absolute lymphocyte count; CBC, complete blood count

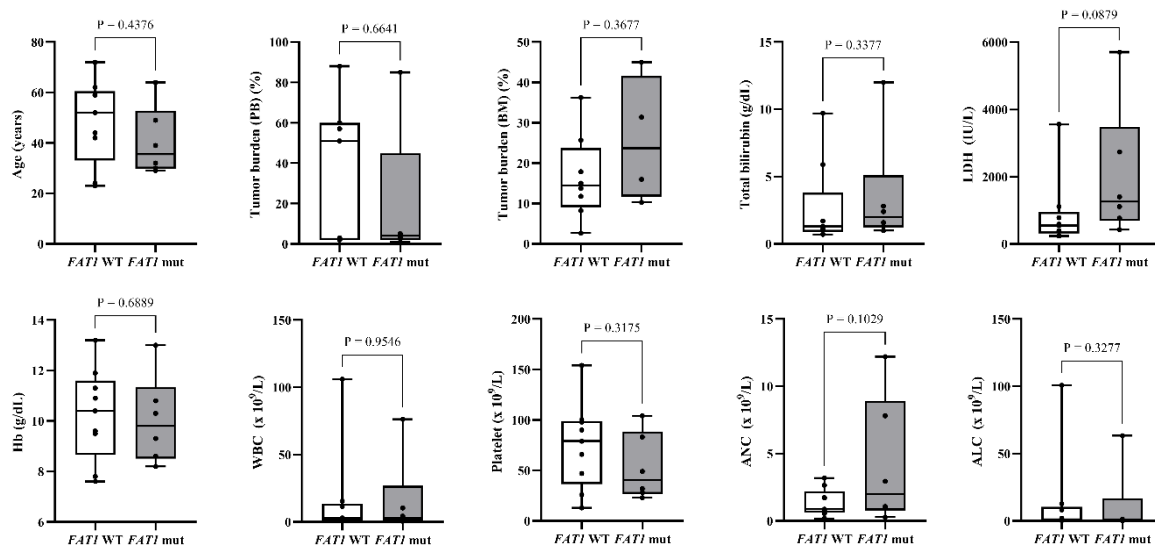

**Supplementary Figure S4.** Kaplan–Meier survival curves of all (n=20) patients according to mutations in (A) *FAT1*, (B) *FAT3*, (C) *FAT4*, (D) *FAT* family, (E) *ARID1A*, and (F) *ARID* family. *FAT* family included *FAT1*, *FAT3*, and *FAT4*. *ARID* family included *ARID1A*, *ARID1B*, and *ARID2*. Survival analyses of patients with *ARID1B* and *ARID2* mutations could not be performed due to the small number of samples. *P* value < 0.05 was considered statistically significant for the Log-rank test. Abbreviations: mut, mutated; WT, wild type

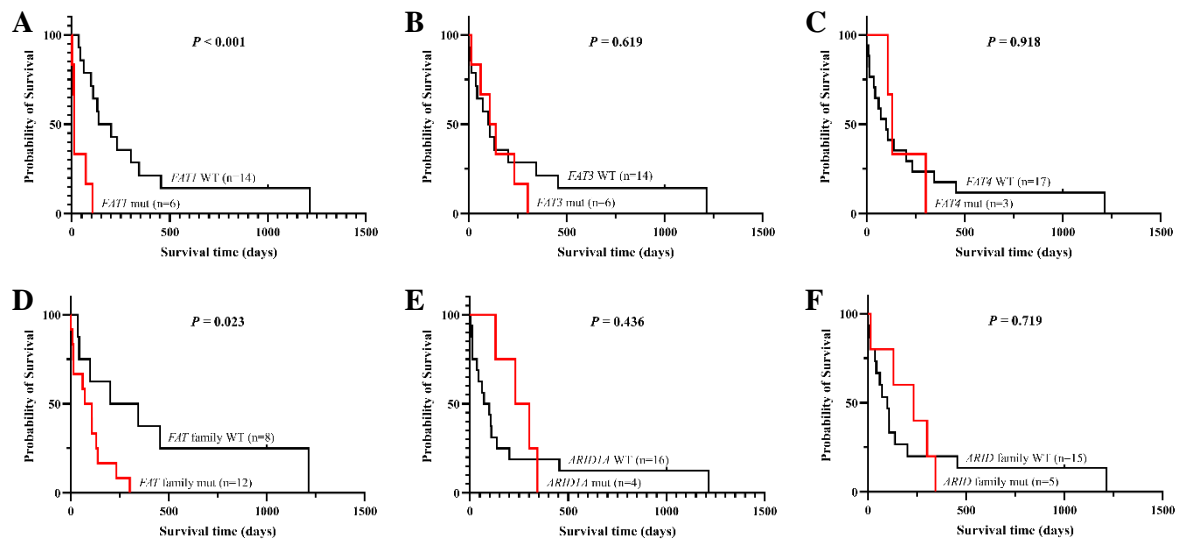

Supplement: Supplementary file 1 [file 49ef2b06796f3d4136657151.pdf]
