# Supplementary material for: Genetic and Clinical Distinction between Aggressive NK-cell Leukemia and Extranodal NK/T-cell Lymphoma with Bone Marrow Involvement
Source: Research Square preprint supplement (doi:10.21203/rs.3.rs-5740535/v1), 2025-04-28
Supplement: Supplementary file 1 [file 57c7e4ba13891e81d29025fe.docx]

**Supplementary Table S4. Mutations in *FAT* family genes and their putative origins**

| **Study ID**a | **Gene**b | **Effect** | **AA** | **CDS** | **Read count** | **VAF (%)** | **Putative origin**c |
| --- | --- | --- | --- | --- | --- | --- | --- |
| A1 | *FAT4* | missense | D681Y | c.2041G>T | 13/767 | 1.69 | somatic |
|  | *FAT4* | missense | T877N | c.2630C>A | 13/598 | 2.17 | somatic |
| A2 | *FAT1* | missense | P1146Q | c.3437C>A | 15/1054 | 1.42 | somatic |
|  | *FAT3* | missense | D2125Y | c.6373G>T | 15/1327 | 1.13 | somatic |
| A3 | *FAT1* | missense | E2855K | c.8563G>A | 14/1007 | 1.39 | somatic |
|  | *FAT3* | missense | P4424L | c.13271C>T | 481/960 | 50.1 | germline |
| A4 | *FAT1* | missense | P3313A | c.9937C>G | 45/690 | 6.52 | somatic |
| A5 | *FAT1* | missense | S3458R | c.10374C>A | 14/753 | 1.86 | somatic |
|  | *FAT1* | nonsense | S2851* | c.8552C>A | 33/1253 | 2.63 | somatic |
| A6 | *FAT1* | nonsense |  | c.-13C>T | 15/682 | 2.2 | somatic |
| A7 | *FAT1* | missense | V3245A | c.9734T>C | 571/1320 | 43.26 | germline |
| A8 | *FAT3* | missense | K1490N | c.4470G>T | 13/910 | 1.43 | somatic |
| A9 | *FAT3* | missense | P4234H | c.12701C>A | 15/1281 | 1.17 | somatic |
| A10 | *FAT3* | missense | A1012T | c.3034G>A | 13/1101 | 1.18 | somatic |
|  | *FAT3* | nonsense | E3740* | c.11218G>T | 14/687 | 2.04 | somatic |
| A12 | *FAT4* | missense | Y233H | c.697T>C | 907/1875 | 48.37 | germline |
| A13 | *FAT4* | missense | D2857H | c.8569G>C | 791/1568 | 50.45 | germline |

a Study subjects were assigned unique identification numbers, which correspond to the order of samples (*x*-axis) in Figure 1.

b Reference transcripts for each gene were as follows: *FAT4* (NM_024582.4), *FAT1* (NM_005245.4), *FAT3* (NM_001008781.2)

c Mutations with VAF 40-60% were presumed to be of germline origin and those with VAF < 40% were of somatic origin.

Abbreviations: AA, amino acid; CDS, coding DNA sequence; VAF, variant allele frequency

**Supplementary Table S5. Clonal hematopoiesis-associated mutations detected in study subjects**

| **Study ID**a | **Gene**b | **Effect** | **AA** | **CDS** | **Read count** | **VAF (%)** |
| --- | --- | --- | --- | --- | --- | --- |
| A1 | *BCORL1* | nonsense | C797* | c.2391C>A | 15/695 | 2.16 |
| A3 | *TP53* | nonsense | R213* | c.637C>T | 41/1667 | 2.46 |
| A4 | *TET2* | nonsense | E1490* | c.4468G>T | 78/1178 | 6.62 |
|  | *BCOR* | nonsense | R976* | c.2926C>T | 44/374 | 11.8 |
| A5 | *TP53* | missense | C238Y | c.713G>A | 35/1071 | 3.27 |
|  | *TP53* | frameshift | P75fs | c.224delC | 38/1420 | 2.68 |
|  | *PTPN11* | missense | G503A | c.1508G>C | 46/1256 | 3.66 |
| A8 | *TP53* | nonsense | Q165* | c.493C>T | 277/2042 | 13.6 |
| A10 | *DNMT3A* | splice site | splicing | c.1554+1G>A | 23/741 | 3.1 |
| A11 | *DNMT3A* | nonsense | Y592* | c.1776C>G | 49/2191 | 2.24 |
| A12 | *ASXL1* | frameshift | K984fs | c.2952_2973del | 80/902 | 8.87 |

a Study subjects were assigned unique identification numbers, which correspond to the order of samples (*x*-axis) in Figure 1.

b Reference transcripts for each gene were as follows: *BCORL1* (NM_021946.4), *TP53* (NM_000546.5), *TET2* (NM_001127208.2), *BCOR* (NM_001123385.2), *PTPN11* (NM_002834.4), *DNMT3A* (NM_022552.4), *ASXL1* (NM_015338.6)

Abbreviations: AA, amino acid; CDS, coding DNA sequence; VAF, variant allele frequency
